# Supplementary material
Source: ML conference proceedings conference paper supplement (https://openaccess.thecvf.com/content/CVPR2023/html/Gao_ULIP_Learning_a_CVPR_2023_paper.html)
Supplement: Supplementary file 1 [file Gao_ULIP_Learning_a_CVPR_2023_supplemental.pdf]

## A. Appendix

### A.1. PointNeXt Backbone Experiments

**PointNeXt** [37] is a concurrent work which proposes a lightweight backbone based on PointNet++ and in particular it gives promising results on the ScanObjectNN benchmark. In order to demonstrate the effectiveness of our ULIP on this most recent backbone, we pre-train PointNeXt using ULIP, and use the pre-trained weights to finetune on the ScanObjectNN dataset.

As shown in Table 7, ULIP significantly improves PointNeXt in both Overall Accuracy and Class-mean Accuracy.

| Model             | Overall Acc                   | Class-mean Acc                |
|-------------------|-------------------------------|-------------------------------|
| PointNeXt* [37]   | 87.4                          | 85.8                          |
| PointNeXt + ULIP  | <b>89.2</b> ( $\uparrow$ 1.8) | <b>88.0</b> ( $\uparrow$ 2.2) |
| PointNeXt †*      | 87.5                          | 85.9                          |
| PointNeXt †+ ULIP | <b>89.7</b> ( $\uparrow$ 2.2) | <b>88.6</b> ( $\uparrow$ 2.7) |

Table 7. 3D classification results on ScanObjectNN for PointNeXt. † indicates a model uses 2K sampled points and all others use 1K sampled points. \* indicates it’s reproduced result.

### A.2. Details of Evaluation Sets in Zero Shot Classification

When evaluating zeroshot classification, we notice that there are some common classes between our pre-train dataset, ShapeNet55, and ModelNet40. Evaluations on these common classes might introduce an unfair comparison of zeroshot performance. Therefore, we introduced three different validation sets for evaluating our models and our baselines on ModelNet40.

**All Set:** Includes all the categories in ModelNet40 as shown in Table 8.

|            |           |         |             |           |
|------------|-----------|---------|-------------|-----------|
| airplane   | bathtub   | bed     | bench       | bookshelf |
| bottle     | bowl      | car     | chair       | cone      |
| cup        | curtain   | desk    | door        | dresser   |
| flower_pot | glass_box | guitar  | keyboard    | lamp      |
| laptop     | mantel    | monitor | night_stand | person    |
| piano      | plant     | radio   | range_hood  | sink      |
| sofa       | stairs    | stool   | table       | tent      |
| toilet     | tv_stand  | vase    | wardrobe    | xbox      |

Table 8. ModelNet40 All Set.

**Medium Set:** We remove categories whose exact category names exist in our pre-training dataset. The resulting categories in this set is shown in Table 9.

|           |        |            |             |         |
|-----------|--------|------------|-------------|---------|
| cone      | cup    | curtain    | door        | dresser |
| glass_box | mantel | monitor    | night_stand | person  |
| plant     | radio  | range_hood | sink        | stairs  |
| stool     | tent   | toilet     | tv_stand    | vase    |
| wardrobe  | xbox   |            |             |         |

Table 9. ModelNet40 Medium Set.

**Hard Set:** We remove both extract category names and their synonyms in our pre-training dataset. The final *Hard Set* is shown in Table 10

|            |             |        |         |           |
|------------|-------------|--------|---------|-----------|
| cone       | curtain     | door   | dresser | glass_box |
| mantel     | night_stand | person | plant   | radio     |
| range_hood | sink        | stairs | tent    | toilet    |
| tv_stand   | xbox        |        |         |           |

Table 10. ModelNet40 Hard Set.

### A.3. Indoor 3D Detection Experiments

In order to show our potential on 3D scene applications, we conduct experiments on ScanNet-v2 dataset and benchmark 3D detection performance based on one of SOTA 3D detection frameworks, Group-Free-3D [27]. In our setting, we use the Group-Free-3D basic model and observe significant improvements as shown in Table 11.

|                      | mAP@0.5                       | mAP@0.5 Averaged              |
|----------------------|-------------------------------|-------------------------------|
| Group-Free-3D        | 48.9                          | 48.4                          |
| Group-Free-3D + ULIP | <b>50.2</b> ( $\uparrow$ 1.3) | <b>49.6</b> ( $\uparrow$ 1.2) |

Table 11. Experiments on indoor 3D Detection. We use Group-Free-3D basic model as our detection framework, and we follow the same metric computation as in [27].
